# Supplementary material
Source: Research Square preprint supplement (doi:10.21203/rs.3.rs-8701959/v1)
Supplement: Supplementary file 1 [file bbf28ff17c064712b4091d48.docx]

Additional File 1. Routine ANC Services providedto respondents attending ANC at PHCs in Anambra, Jigawa, and Kebbi state

| ANC Services received | Anambra | | Jigawa | | Kebbi | | Total | |
| --- | --- | --- | --- | --- | --- | --- | --- | --- |
| **N (%)** | **95% CI** | **N (%)** | **95% CI** | **N (%)** | **95% CI** | **N (%)** | **95% CI** |
| Nutritional supplements, including iron/folic acid | 218(54.5%) | 49.5-59.5 | 164(41.0%) | 36.1-46.0 | 150(37.5%) | 32.7-42.5 | 532(44.3%) | 41.5-47.2 |
| IPD | 48(12.0%) | 9.0-15.6 | 50(12.5%) | 9.4-16.2 | 70(17.5%) | 13.9-21.6 | 168(14.0%) | 12.1-16.1 |
| Tetanus vaccine | 162(40.5%) | 35.7-45.5 | 156(39.0%) | 34.2-44.0 | 139(34.8%) | 30.1-39.6 | 457(38.1%) | 35.3-40.9 |
| IPTp | 200(50.0%) | 45.0 - 55.0 | 101(25.3%) | 21.1-29.8 | 200(50.0%) | 45.0-55.0 | 501(41.8%) | 38.9-44.6 |
| Counselling | 318(79.5%) | 75.2-83.4 | 185(46.3%) | 41.3-51.3 | 217(54.3%) | 49.2-59.2 | 720(60.0%) | 57.2-62.8 |
| Blood pressure measurement | 327(81.8%) | 77.6-85.4 | 294(73.5%) | 68.9-77.8 | 297(74.3%) | 69.7-78.5 | 918(76.5%) | 74.0-78.9 |
| Urine tests | 270(67.5%) | 62.7-72.1 | 248(62.0%) | 57.0-66.8 | 211(52.8%) | 47.7-57.7 | 729(60.8%) | 57.9-63.5 |
| Blood test | 262(65.5%) | 60.6-70.2 | 241(60.3%) | 55.3-65.1 | 257(64.3%) | 59.3-69.0 | 760(63.3%) | 60.5-66.1 |
| Had all the 8 critical services (Good) | 26(6.5%) | 4.3-9.4 | 16(4.0%) | 2.3-6.4 | 56(14.0%) | 10.8-17.8 | 98(8.2%) | 6.7-9.9 |
| Did not receive all the 8 critical services (Poor) | 374 (93.5%) |  | 384 (96.0%) |  | 344 (86.0%) |  | 1,102 (91.8%) |  |
